# Supplementary material for: A Bioinspired Gait Transition Model for a Hexapod Robot
Source: Hindawi journal article supplement (doi:10.1155/2018/2913636), 2018-09-03
Supplement: f1 [file 2913636.f1.zip]

Archive with 2 entries (2 files):
- Ant locomotion observation experiment.mp4
- Hexapod robot locomotion experiment.mp4
